# Supplementary material
Source: HighWire-hosted journal article supplement (doi:10.1101/rna.080414.125)
Supplement: Supplemental_Material.docx [file Supplemental_Material.docx]

**Solution Structure Determination and Biophysical Characterisation Studies of 7SK RNP and 7SL SRP snRNAs | Supplementary Details**

**Supplementary Table 1**: Sequence Information of Wildtype 7SK snRNA and 7SL RNA. T7 Promoter region is highlighted in **Cyan**, and the *XbaI* Restriction Enzyme cut-site is highlighted in **Yellow**. Missing nucleotide sequence from 7SL RNA at the 5′-end is highlighted in **Red**, otherwise transcribed RNA sequence identity is 98.7% accurate with 7SL RNA X01037.1. Secondary Structure information from previously performed chemical probing and DANCE-MaP studies are included for 7SK Linear, State A, and B snRNAs and 7SL RNA.

| **Name** | **Length**  **(nts)** | **Sequence (5′ - 3′)** | **Mw**  **(kDa)** | **Extinction Coefficient (M-1cm-1)** |
| --- | --- | --- | --- | --- |
| **>NR_001445.2 Homo sapiens RNA component of 7SK nuclear ribonucleoprotein (RN7SK), small nuclear RNA** | **332** | **GGATGTGAGGGCGATCTGGCTGCGACATCTGTCACCCCATTGATCGCCAGGGTTGATTCGGCTGATCTGGCTGGCTAGGCGGGTGTCCCCTTCCTCCCTCACCGCTCCATGTGCGTCCCTCCCGAAGCTGCGCGCTCGGTCGAAGAGGACGACCATCCCCGATAGAGGAGGACCGGTCTTCGGTCAAGGGTATACGAGTAGCTGCGCTCCCCTGCTAGAACCTCCAAACAAGCTCTCAAGGTCCATTTGTAGGAGAACGTAGGGTAGTCAAGCTTCCAAGACTCCAGACACATCCAAATGAGGCGCTGCATGTGGCAGTCTGCCTTTCTTTT** | **106.61** | **3168400** |
| **>7SK RNA Transcript including a 5’-T7 RNAP Promoter and 3’-*XbaI* cutsite** | **356** | **TAATACGACTCACTATAGGGATGTGAGGGCGATCTGGCTGCGACATCTGTCACCCCATTGATCGCCAGGGTTGATTCGGCTGATCTGGCTGGCTAGGCGGGTGTCCCCTTCCTCCCTCACCGCTCCATGTGCGTCCCTCCCGAAGCTGCGCGCTCGGTCGAAGAGGACGACCATCCCCGATAGAGGAGGACCGGTCTTCGGTCAAGGGTATACGAGTAGCTGCGCTCCCCTGCTAGAACCTCCAAACAAGCTCTCAAGGTCCATTTGTAGGAGAACGTAGGGTAGTCAAGCTTCCAAGACTCCAGACACATCCAAATGAGGCGCTGCATGTGGCAGTCTGCCTTTCTTTTTCTAGA** | **-** | **-** |
| **>X01037.1 Human 7SL RNA sequence** | **303** | **AGGCGCCGGGCGCGGTGGCGCGTGCCTGTAGTCCCAGCTACTCGGGAGGCTGAGGCTGGAGGATCGCTTGAGTCCAGGAGTTCTGGGCTGTAGTGCGCTATGCCGATCGGGTGTCCGCACTAAGTTCGGCATCAATATGGTGACCTCCCGGGAGCGGGGGACCACCAGGTTGCCTAAGGAGGGGTGAACCGGCCCAGGTCGGAAACGGAGCAGGTCAAAACTCCCGTGCTGATCAGTAGTGGGATCGCGCCTGTGAATAGCCACTGCACTCCAGCCTGGGCAACATAGCGAGACCCCGTCTCT** | **98.11** | **2911300** |
| **>7SL RNA Transcript including 5’-T7 RNAP Promoter and 3’-*XbaI* cutsite** | **324** | **TAATACGACTCACTATAG(AGGC)GCCGGGCGCGGTGGCGCGTGCCTGTAGTCCCAGCTACTCGGGAGGCTGAGGCTGGAGGATCGCTTGAGTCCAGGAGTTCTGGGCTGTAGTGCGCTATGCCGATCGGGTGTCCGCACTAAGTTCGGCATCAATATGGTGACCTCCCGGGAGCGGGGGACCACCAGGTTGCCTAAGGAGGGGTGAACCGGCCCAGGTCGGAAACGGAGCAGGTCAAAACTCCCGTGCTGATCAGTAGTGGGATCGCGCCTGTGAATAGCCACTGCACTCCAGCCTGGGCAACATAGCGAGACCCCGTCTCTTCTAGA** | **96.79** | **2871200** |
|  |  |  |  |  |
| **RNA Name** | **Type** | **Sequence** |  |  |
| **>7SK Linear Secondary Structure** | **RNA** | **GGAUGUGAGGGCGAUCUGGCUGCGACAUCUGUCACCCCAUUGAUCGCCAGGGUUGAUUCGGCUGAUCUGGCUGGCUAGGCGGGUGUCCCCUUCCUCCCUCACCGCUCCAUGUGCGUCCCUCCCGAAGCUGCGCGCUCGGUCGAAGAGGACGACCAUCCCCGAUAGAGGAGGACCGGUCUUCGGUCAAGGGUAUACGAGUAGCUGCGCUCCCCUGCUAGAACCUCCAAACAAGCUCUCAAGGUCCAUUUGUAGGAGAACGUAGGGUAGUCAAGCUUCCAAGACUCCAGACACAUCCAAAUGAGGCGCUGCAUGUGGCAGUCUGCCUUUCUUUU** |  |  |
| **Dot-Bracket** | **.((((((((((......((....((((.(.(.(.(((((..(((((((...........))).)))))))..))...).).).))))))......)))))))...)))........(((((((((.((.....))))))(((....(((......))).)))..)))).)..............................(((...((.((((.(......((((..((((...............)))).))))...).)))).))...)))...........................((((.((((.....))))...)))).......** |  |  |
| **>7SK State A “Open”**  **Secondary Structure** | **RNA** | **GGAUGUGAGGGCGAUCUGGCUGCGACAUCUGUCACCCCAUUGAUCGCCAGGGUUGAUUCGGCUGAUCUGGCUGGCUAGGCGGGUGUCCCCUUCCUCCCUCACCGCUCCAUGUGCGUCCCUCCCGAAGCUGCGCGCUCGGUCGAAGAGGACGACCAUCCCCGAUAGAGGAGGACCGGUCUUCGGUCAAGGGUAUACGAGUAGCUGCGCUCCCCUGCUAGAACCUCCAAACAAGCUCUCAAGGUCCAUUUGUAGGAGAACGUAGGGUAGUCAAGCUUCCAAGACUCCAGACACAUCCAAAUGAGGCGCUGCAUGUGGCAGUCUGCCUUUCUUUU** |  |  |
| **Dot-Bracket** | **(((((.(((((......((....((((.(.(.(.(((((..(((((((...........))).)))))))..))...).).).))))))......))))).............((((((((((((.((.....))))))..)).).)))))...............(((((((((.....)))))..((..........((((...((.((((.(.....(((.((((....(.......)....)))).))).....).)))).))...)))).))....)))).....)))))......(((.((((.....))))...)))........** |  |  |
| **>7SK State B “Closed” Secondary Structure** | **RNA** | **GGAUGUGAGGGCGAUCUGGCUGCGACAUCUGUCACCCCAUUGAUCGCCAGGGUUGAUUCGGCUGAUCUGGCUGGCUAGGCGGGUGUCCCCUUCCUCCCUCACCGCUCCAUGUGCGUCCCUCCCGAAGCUGCGCGCUCGGUCGAAGAGGACGACCAUCCCCGAUAGAGGAGGACCGGUCUUCGGUCAAGGGUAUACGAGUAGCUGCGCUCCCCUGCUAGAACCUCCAAACAAGCUCUCAAGGUCCAUUUGUAGGAGAACGUAGGGUAGUCAAGCUUCCAAGACUCCAGACACAUCCAAAUGAGGCGCUGCAUGUGGCAGUCUGCCUUUCUUUU** |  |  |
| **Dot-Bracket** | **(((((((..((((((((((....(((....)))...)))..))))))).(.((.....(.((.......)).).........((.(.(((((((((.(((..((....(((..((((((((((((.((.....))))))..)).).)))))..)))...))...)))))))((((.....)))).))))).).))....((((...((.((((.(.....(((.((((....(.......)....)))).))).....).)))).))...))))......)).)....))))))).....((((.((((.....))))...)))).......** |  |  |
| **>7SL Secondary Structure** | **RNA** | **GCCGGGCGCGGUGGCGCGUGCCUGUAGUCCCAGCUACUCGGGAGGCUGAGGCUGGAGGAUCGCUUGAGUCCAGGAGUUCUGGGCUGUAGUGCGCUAUGCCGAUCGGGUGUCCGCACUAAGUUCGGCAUCAAUAUGGUGACCUCCCGGGAGCGGGGGACCACCAGGUUGCCUAAGGAGGGGUGAACCGGCCCAGGUCGGAAACGGAGCAGGUCAAAACUCCCGUGCUGAUCAGUAGUGGGAUCGCGCCUGUGAAUAGCCACUGCACUCCAGCCUGGGCAACAUAGCGAGACCCCGUCUCU** |  |  |
| **Dot-Bracket** | **(((.(((.((......)).))).....((((........))))))).(((.(.((....(((((...(.(((((....((((..((.((((.(((((......(.((.((((.(((((.....((((......(((((..(.((((....)))).)..)))))...))))......((.((..............((....))............)).))............))))))))...).)).)...))))))))).))..))))))))).).....)))))...)).).))).** |  |  |

**Supplementary Table 2**: Distribution of SAXS Envelopes from 7SK State A and State B snRNAs and 7SL RNA from DAMCLUST into Clusters. 100 DAMMIN models were produced for each RNA as a result of Small Angle X-ray scattering experiments and were further clustered into similar simulated annealing models using DAMCLUST. Cluster number represents the number of clusters produced with the Definite PDB representing the whole of that singular cluster, while the Percent Coverage indicates the percent of 100 DAMMIN simulated annealing models had near-identical NSD values to be grouped together within said cluster. Table includes the distances between relative clusters from a further narrowing of NSD values from 0.95 – 1.05 to condense clusters into each other. Clusters which presented themselves with near-similarity (0.95 – 1.05) were combined together to form larger clusters. Clusters that exhibited NSD values less than 0.95 or greater than 1.05 were not combined.

|  |  |  |  |  | **Distances Between Representative Clusters within 0.95 – 1.05 NSD** | | |
| --- | --- | --- | --- | --- | --- | --- | --- |
| **7SL RNA** | **Cluster Number** | **Definite PDB** | **Percent Coverage** |  | **Cluster 1** | **Cluster 2** | **NSD** |
|  | **1** | **36** | **1%** |  | **1** | **3** | **1.0316520763269117** |
| **2** | **58** | **2%** |  | **1** | **4** | **1.0116377393739600** |
| **3** | **60** | **2%** |  | **2** | **4** | **1.0460369427121725** |
| **4** | **77** | **95%** |  |  | | |
| **7SK State A SAXS Envelope Low [MgCl2]** | **Clusters Number** | **Definite PDB** | **Percent**  **Coverage** |  | **Cluster 1** | **Cluster 2** | **NSD** |
|  | **1** | **47** | **2%** |  | **1** | **10** | **1.0214324581645551** |
| **2** | **63** | **1%** |  | **10** | **13** | **1.0535538242659543** |
| **3** | **64** | **3%** |  |  | | |
| **4** | **69** | **3%** |  |
| **5** | **49** | **4%** |  |
| **6** | **44** | **15%** |  |
| **7** | **6** | **3%** |  |
| **8** | **94** | **2%** |  |
| **9** | **46** | **45%** |  |
| **10** | **71** | **7%** |  |
| **11** | **97** | **3%** |  |
| **12** | **23** | **10%** |  |
| **13** | **99** | **2%** |  |
| **7SK State B SAXS Envelope High [MgCl2]** | **Clusters Number** | **Definite PDB** | **Percentage** |  | **Cluster 1** | **Cluster 2** | **NSD** |
|  | **1** | **14** | **1%** |  | **3** | **4** | **1.0398223972376328** |
| **2** | **30** | **2%** |  | **7** | **17** | **1.0400356414619785** |
| **3** | **23** | **3%** |  | **9** | **12** | **1.0512316121426915** |
| **4** | **35** | **2%** |  | **10** | **15** | **1.0568443196418451** |
| **5** | **53** | **2%** |  | **12** | **13** | **1.0363759089251965** |
| **6** | **59** | **3%** |  |  | | |
| **7** | **3** | **3%** |  |
| **8** | **61** | **3%** |  |
| **9** | **73** | **14%** |  |
| **10** | **86** | **11%** |  |
| **11** | **17** | **7%** |  |
| **12** | **31** | **16%** |  |
| **13** | **75** | **3%** |  |
| **14** | **96** | **7%** |  |
| **15** | **44** | **5%** |  |
| **16** | **55** | **13%** |  |
| **17** | **99** | **5%** |  |


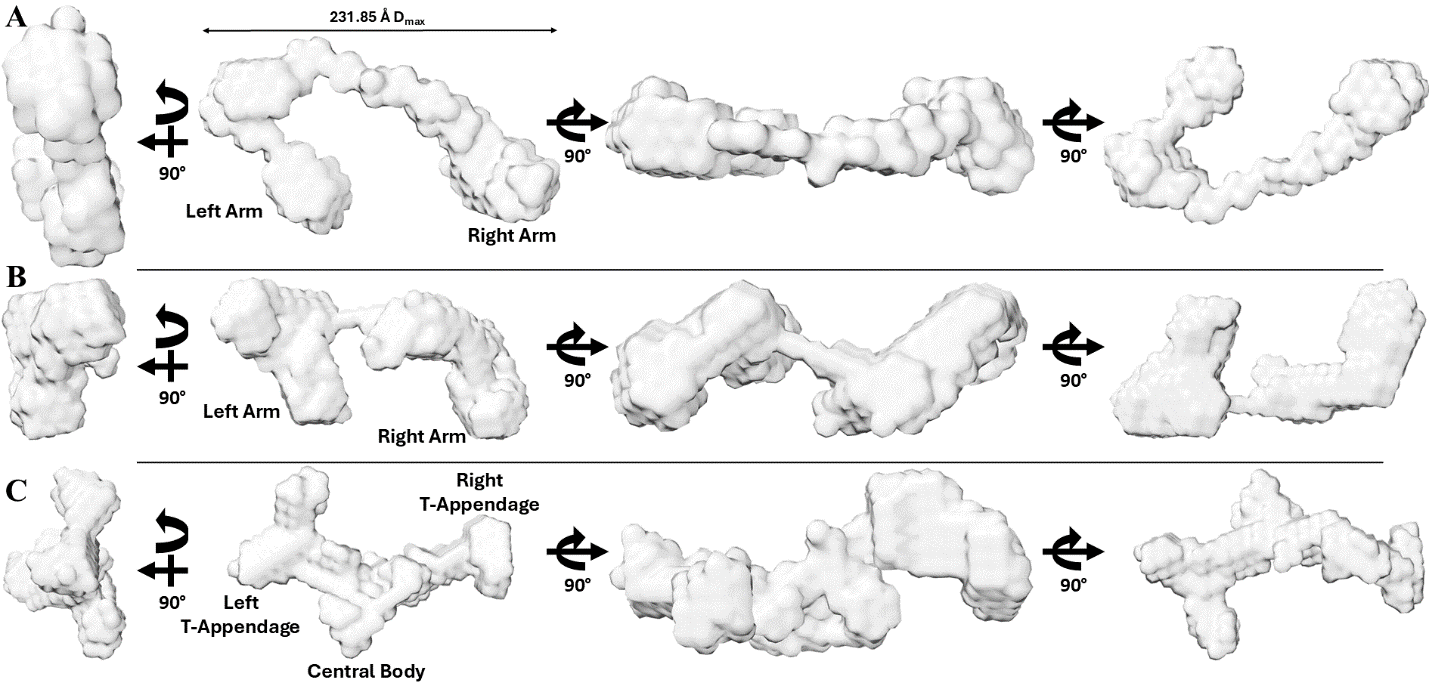


**Supplementary Figure 1**: Top Three Low-Resolution SAXS Envelopes of 7SK State A snRNAs (**Grey**) from Clusters 1 (**A**), 2 (**B**), and 3 (**C**). Clusters 1 – 3 appear from the **Top**, **Middle**, and **Bottom** respectively in descending order of coverage from the original 100 DAMMIN models. DAMCLUST generated envelopes generally depict an elongated, asymmetrical, and extended structure with Clusters 1 and 2 forming a clamp-like orientation while Cluster 3 forms a cross-like structure. The maximum length of the envelope is 231.85 Å which applies to all Top Three SAXS envelopes. Key features depict prominent left and right arms in Clusters 1 and 2, while Cluster 3 appears bulkier displaying a central body with flanking T-shaped appendages. Dimensions are represented by the Dmax obtained from the P(r) analysis. envelopes are rotated from the centre along their x-axis and y-axis by 90º as represented by the inset.


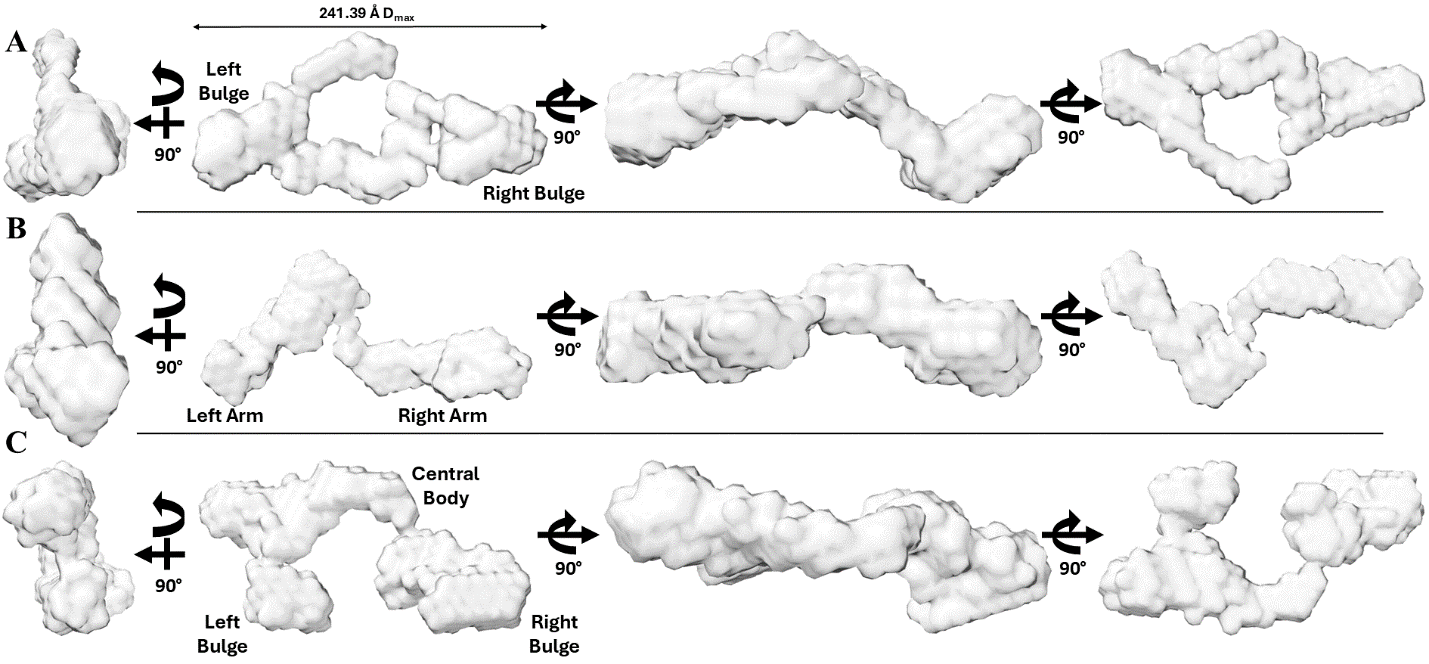


**Supplementary Figure 2**: Top Three Low-Resolution SAXS Envelopes of 7SK State B snRNAs (**Grey**) from Clusters 1 (**A**), 2 (**B**), and 3 (**C**). Clusters 1 – 3 appear from the **Top**, **Middle**, and **Bottom** respectively in descending order of coverage from the original 100 DAMMIN models. DAMCLUST generated envelopes generally depict an elongated, asymmetrical, and extended structure. The maximum length of the envelope is 241.39 Å which applies to all Top Three SAXS envelopes. Key features depict Cluster 1 appearing clamp-like with a pocket of space surrounded by a left and right bulge. Cluster 2 is generally extended with a left and right arm. Cluster 3 appears with central body and a right bulge formed around a salient of space. Dimensions are represented by the Dmax obtained from the P(r) analysis. envelopes are rotated from the centre along their x-axis and y-axis by 90º as represented by the inset.


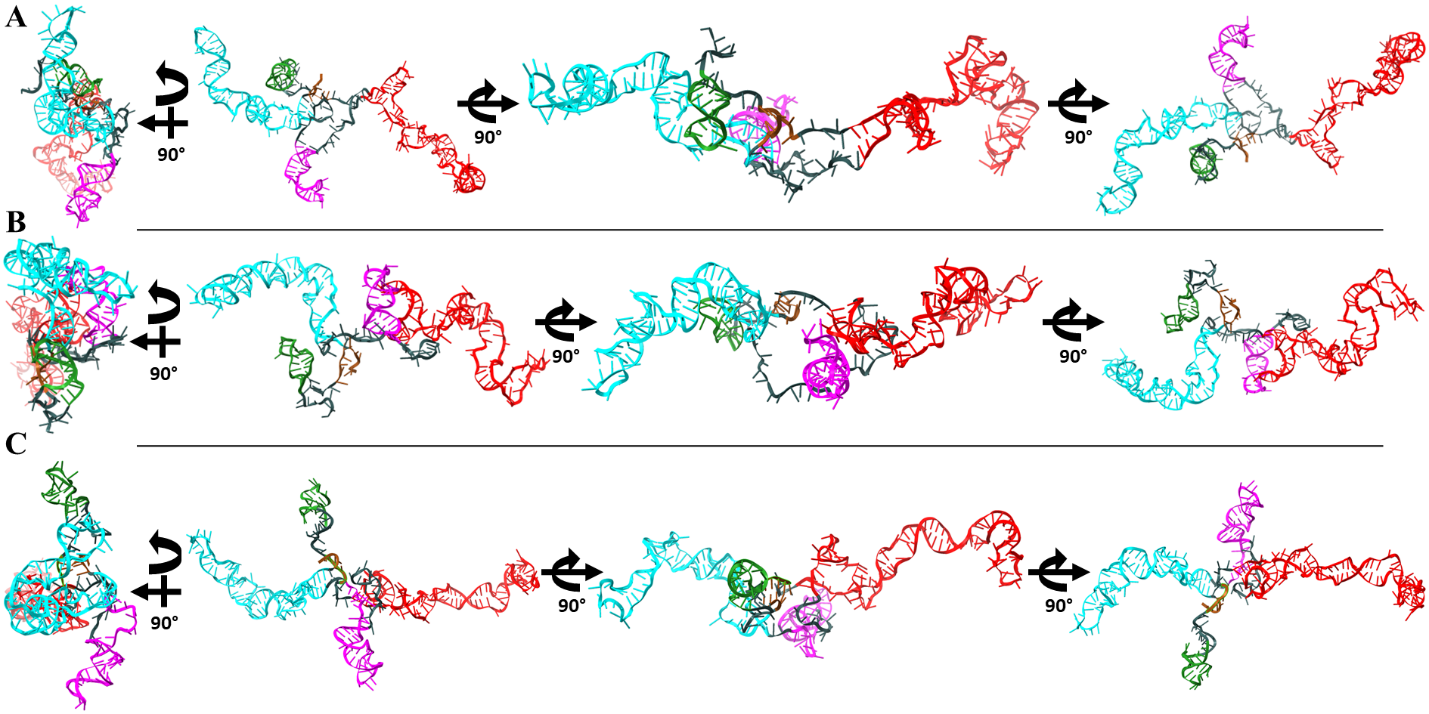


**Supplementary Figure 3**: SimRNA Coarse-Grained, High-Fidelity Models of 7SK State A snRNA. Figure 7 displays 7SK State A snRNA that has good fitting (low NSD, near ~1.0) with their SAXS envelope based upon Figure 6 clusters C1 (**A**), C2 (**B**), and C3 (**C**). Major Stem-Loops of the 7SK snRNA molecule are presented here, SL1 (**Cyan**), SL2 (**Magenta**), SL3 (**Red**), SL4 (**Forest Green**), and SL0 (**Saddle Brown**) with the remainder of the molecule being coloured **Dark Slate Grey**. Molecules are generally presented as forming a cross in three-dimensional space, with SL2 and SL3 being closely adjacent. Models are rotated from the centre along their x-axis and y-axis by 90º as represented by the inset.


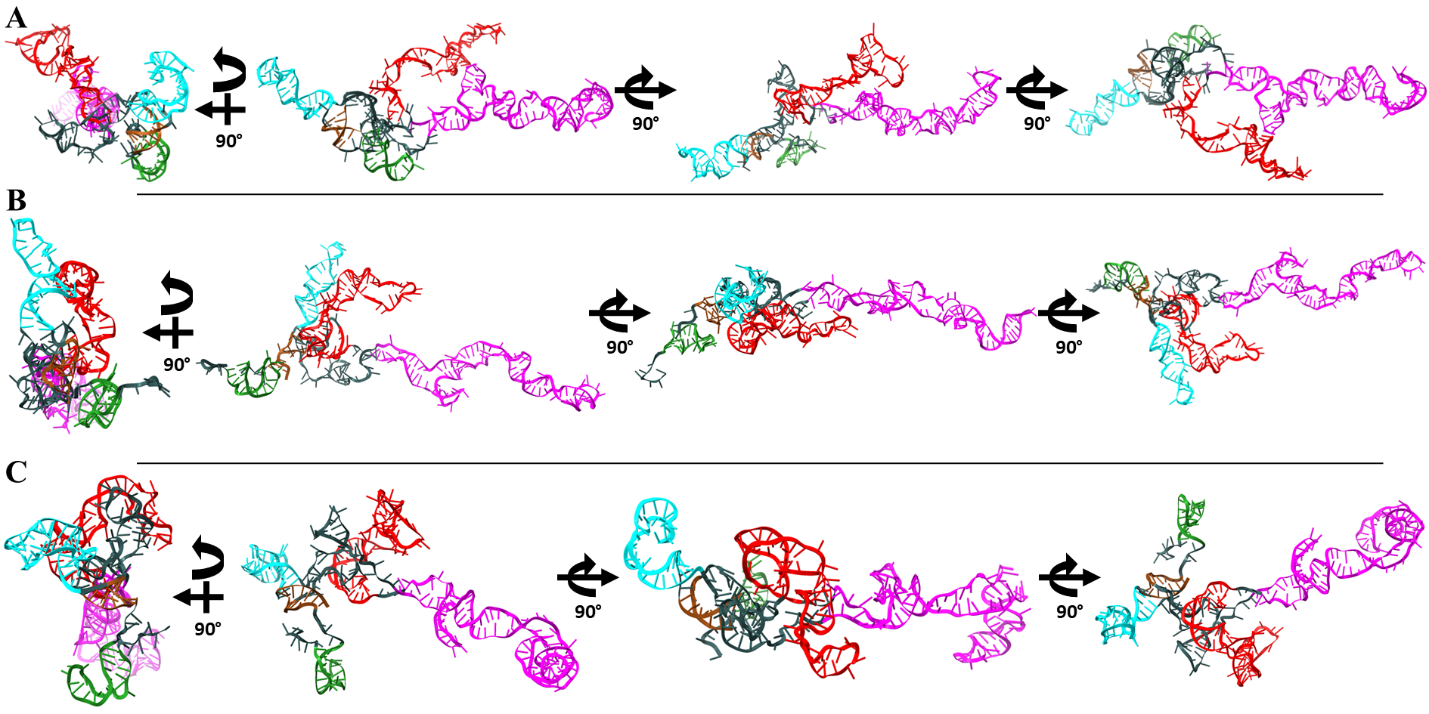


**Supplementary Figure 4**: SimRNA Coarse-Grained, High-Fidelity Models of 7SK State B snRNA. Figure 9 displays 7SK State B snRNA that has good fitting (low NSD, near ~1.0) with their SAXS envelope based upon Figure 8 clusters C1 (**A**), C2 (**B**), and C3 (**C**). Major Stem-Loops of the 7SK snRNA molecule are presented here, SL1 (**Cyan**), SL2 (**Magenta**), SL3 (**Red**), SL4 (**Forest Green**), and SL0 (**Saddle Brown**) with the remainder of the molecule being coloured **Dark Slate Grey**. Molecules are generally presented as forming a K-shape in three-dimensional space, with SL2 and SL3 being closely adjacent. Model (**B**) from C2 differs in that SL1 and SL2 form close interactions, while the structure is generally extended. Models are rotated from the centre along their x-axis and y-axis by 90º as represented by the inset.


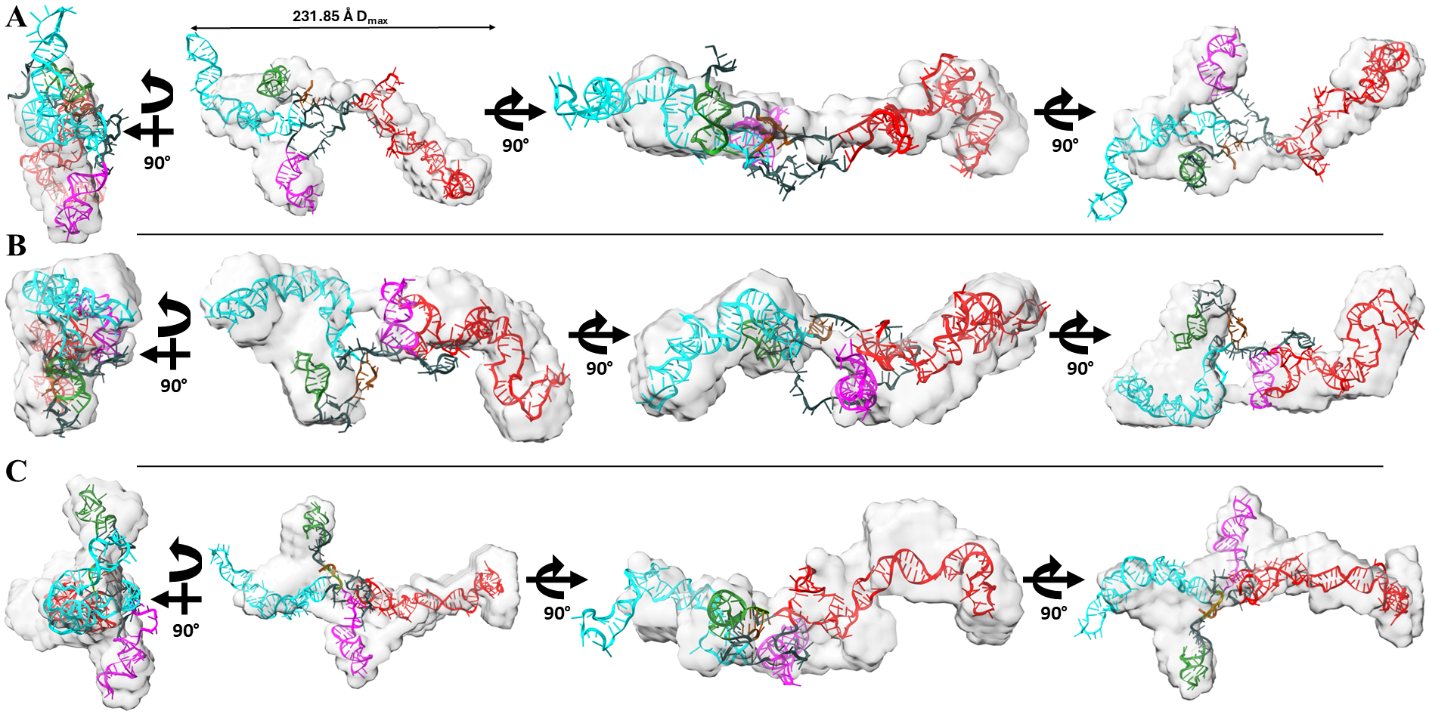


**Supplementary Figure 5**: Superimposed Coarse-Grained, High-Fidelity SimRNA Models of 7SK State A snRNA over Top Three SAXS Envelopes. Figure 8 represents the combined SimRNA models and SAXS envelopes of State A 7SK snRNA based upon the Figure 6 clusters C1 (**A**), C2 (**B**), and C3 (**C**) and Figure 7 Models (**A** – **C**) in respective order. Major Stem-Loops of the State A 7SK snRNA molecule is presented here, SL1 (**Cyan**), SL2 (**Magenta**), SL3 (**Red**), SL4 (**Forest Green**), and SL0 (**Saddle Brown**) with the remainder of the molecule being coloured **Dark Slate Grey**. Overall, SAXS envelopes indicate a general agreement with the computationally generated structures, showing high overlap of the extended molecule. Models are rotated from the centre along their x-axis and y-axis by 90º as represented by the inset.


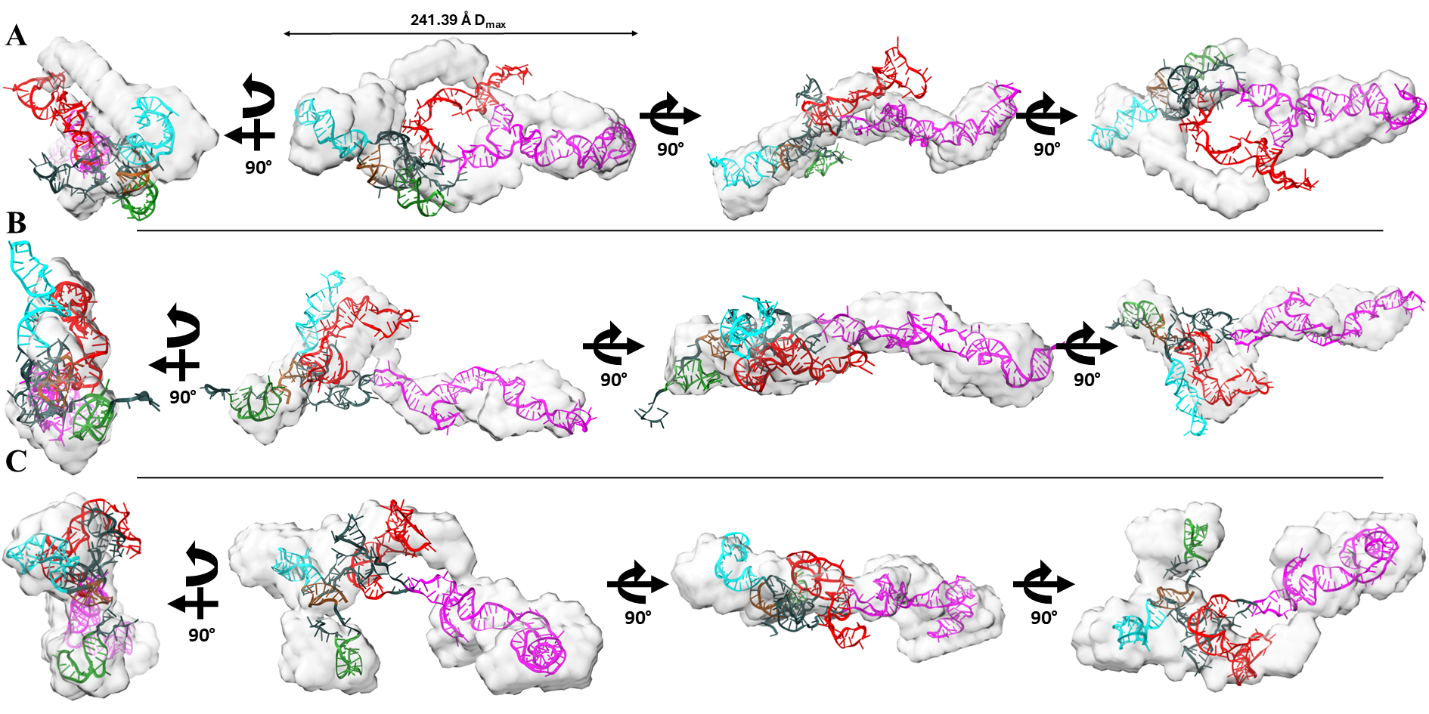


**Supplementary Figure 6**: Superimposed Coarse-Grained, High-Fidelity SimRNA Models of 7SK State B snRNA over the Top Three SAXS Envelopes. Figure 11 represents the combined SimRNA models and SAXS envelopes of State B 7SK snRNA based upon the Figure 9 clusters C1 (**A**), C2 (**B**), and C3 (**C**) and Figure 10 Models (**A** – **C**) in respective order. Major Stem-Loops of the State B 7SK snRNA molecule is presented here, SL1 (**Cyan**), SL2 (**Magenta**), SL3 (**Red**), SL4 (**Forest Green**), and SL0 (**Saddle Brown**) with the remainder of the molecule being coloured **Dark Slate Grey**. Overall, SAXS envelopes indicate a general agreement with the computationally generated structures, showing high overlap of the extended molecule. Models are rotated from the centre along their x-axis and y-axis by 90º as represented by the inset.


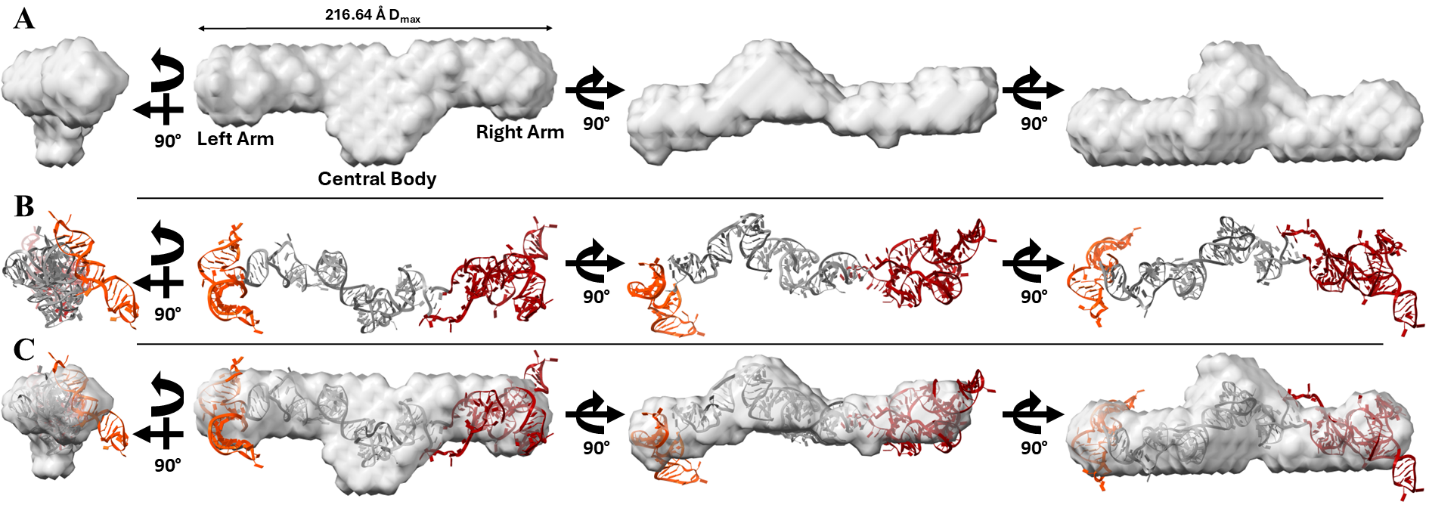


**Supplementary Figure 7**: Definitive Low-Resolution SAXS Envelope of 7SL RNA (**Grey**) and Superimposed Overlays of 7SL Coarse-Grained, High-Fidelity SimRNA Models. (**A**) Represents a single, majority representative SAXS envelope derived from a cluster exhibiting near (~1.0) NSD of 100 DAMMIN models. DAMCLUST generated envelopes generally depict a compact, elongated, and symmetrical structure. The maximum length of the envelope is 216.64 Å. Key features depict 7SL RNA envelope to have two left and right arms which flank a central V-shaped body. Dimensions are represented by the Dmax obtained from the P(r) analysis. (**B**) Displays the high-fidelity SimRNA model with (**C**) portraying the overlap between the SAXS envelope and SimRNA model. 5′-Domain (**Orange**), a Central Rod (**Dark Grey**), and a Central Domain (**Maroon**). Envelopes and SimRNA models are rotated from the centre along their x-axis and y-axis by 90º as represented by the inset.

**Supplementary Table 3**: Fitting Table of the 7SK State A and State B snRNAs and 7SL RNA SAXS Envelopes with Coarse-Grained SimRNA Models. SAXS Envelopes and fitted SimRNA models were assessed using Correlative Fit Values (Fit-in-Map) and NSD, and were also inspected visually for overlap, and sensible arrangements. Models displaying adequate overlap (low NSD, close to 1.0) and adequate fitting (Correlative Value close to 1.0) were selected. Clusters correspond to their respective SAXS Envelope PDB structure. Coarse-Grained SimRNA models highlighted in green were selected to proceed into figure models and MD modelling.

| **RNA Name** |  | | | |
| --- | --- | --- | --- | --- |
| **7SL RNA**  **SAXS Envelope** | **PDB** | **NSD** | **Correlation Value** | **Visual Inspection** |
| **Cluster 1** | **77-1-flt.pdb** | **0** | **-** | **Referential SAXS Envelope** |
|  | **7SL_cg-000703_AAr.pdb** | **1.135** | **0.7371** |  |
| **7SL_cg-000701_AAr.pdb** | **1.141** | **0.7484** | **Mostly fits, high overlap, and good orientation.** |
| **7SL_cg-001199_AAr.pdb** | **1.155** | **0.7063** |  |
| **7SL_cg-001202_AAr.pdb** | **1.161** | **0.7007** |  |
| **7SL_cg-000702_AAr.pdb** | **1.164** | **0.7432** |  |
| **7SL_cg-001204_AAr.pdb** | **1.164** | **0.7118** |  |
| **7SL_cg-000700_AAr.pdb** | **1.176** |  |  |
| **7SL_cg-001206_AAr.pdb** | **1.178** |  |  |
| **7SL_cg-000949_AAr.pdb** | **1.183** |  |  |
| **7SK State A SAXS Envelope Low [MgCl2]** | **PDB** | **NSD** | **Correlation Value** | **Visual Inspection** |
| **Cluster 1** | **46-1-flt.pdb** | **0** | **-** | **Referential SAXS Envelope** |
|  | **stateA_cg-000124_AAr.pdb** | **1.443** | **0.6177** | **Mostly fits.** |
| **stateA_cg-000869_AAr.pdb** | **1.459** | **0.6089** | **Mostly Fits, Alternative Rearrangement.** |
| **stateA_cg-000125_AAr.pdb** | **1.473** | **0.5893** |  |
| **stateA_cg-000862_AAr.pdb** | **1.474** | **0.6189** |  |
| **stateA_cg-000868_AAr.pdb** | **1.476** | **0.6194** |  |
| **stateA_cg-000867_AAr.pdb** | **1.484** | **0.6057** |  |
| **Cluster 2** | **44-1-flt.pdb** | **0** | **-** | **Referential SAXS Envelope** |
|  | **stateA_cg-000216_AAr.pdb** | **1.440** | **0.727** | **Mostly fits.** |
| **stateA_cg-000215_AAr.pdb** | **1.502** | **0.7202** |  |
| **stateA_cg-000881_AAr.pdb** | **1.595** | **0.6465** |  |
| **stateA_cg-000863_AAr.pdb** | **1.601** | **0.6742** |  |
| **stateA_cg-000207_AAr.pdb** | **1.611** | **0.6534** |  |
| **stateA_cg-000880_AAr.pdb** | **1.621** | **0.6578** |  |
| **Cluster 3** | **71-1-flt.pdb** | **0** | **-** | **Referential SAXS Envelope** |
|  | **stateA_cg-000197_AAr.pdb** | **1.627** | **0.6651** |  |
| **stateA_cg-000152_AAr.pdb** | **1.645** | **0.6926** | **Mostly fits.** |
| **stateA_cg-000150_AAr.pdb** | **1.675** | **0.6511** |  |
| **stateA_cg-000151_AAr.pdb** | **1.697** | **0.6533** |  |
| **stateA_cg-000139_AAr.pdb** | **1.716** | **0.6675** |  |
| **stateA_cg-000274_AAr.pdb** | **1.721** | **0.6934** |  |
| **7SK State B SAXS Envelope High [MgCl2]** | **PDB** | **NSD** | **Correlation Value** | **Visual Inspection** |
| **Cluster 1** | **31-1-flt.pdb** | **0** | **-** | **Referential SAXS Envelope** |
|  | **stateB_cg-000193_AAr.pdb** | **1.592** | **0.6095** |  |
| **stateB_cg-000221_AAr.pdb** | **1.608** | **0.5965** | **Has an appropriate orientation, mostly fits, and is logical.** |
| **stateB_cg-000215_AAr.pdb** | **1.617** | **0.6137** |  |
| **stateB_cg-000214_AAr.pdb** | **1.62** | **0.6138** |  |
| **stateB_cg-000194_AAr.pdb** | **1.637** | **0.5981** | **Has an appropriate orientation and mostly fits.** |
| **stateB_cg-000212_AAr.pdb** | **1.647** | **0.6304** |  |
| **Cluster 2** | **86-1-flt.pdb** | **0** | **-** | **Referential SAXS Envelope** |
|  | **stateB_cg-000136_AAr.pdb** | **1.366** | **0.6643** | **Mostly Fits** |
| **stateB_cg-000161_AAr.pdb** | **1.374** | **0.6714** |  |
| **stateB_cg-000137_AAr.pdb** | **1.377** | **0.6536** |  |
| **stateB_cg-000162_AAr.pdb** | **1.449** | **0.6404** |  |
| **stateB_cg-000134_AAr.pdb** | **1.451** | **0.6367** |  |
| **stateB_cg-000155_AAr.pdb** | **1.454** | **0.6293** |  |
| **Cluster 3** | **55-1-flt.pdb** | **0** | **-** | **Referential SAXS Envelope** |
|  | **stateB_cg-000194_AAr.pdb** | **1.648** | **0.6887** | **Referential SAXS Envelope** |
| **stateB_cg-000195_AAr.pdb** | **1.694** | **0.6877** | **Mostly Fits** |
| **stateB_cg-000196_AAr.pdb** | **1.744** | **0.6794** |  |
| **stateB_cg-000212_AAr.pdb** | **1.763** | **0.7089** |  |
| **stateB_cg-000181_AAr.pdb** | **1.77** | **0.6668** |  |
| **stateB_cg-000201_AAr.pdb** | **1.778** | **0.6714** |  |

**Supplemental Movie 1**: MDfit-GROMACS Fitting of SimRNA-derived Coarse-Grained 7SK State A snRNA into Low-Resolution, Three-Dimensional SAXS Envelope. Fitted model is the result of 200,000 iterations of fitting for a molecular weight of 7049 atoms. Major Stem-Loops of the State A 7SK snRNA molecule is presented here, SL1 (**Cyan**), SL2 (**Magenta**), SL3 (**Red**), SL4 (**Green**), and SL0 (**Ochre**) with the remainder of the molecule being coloured **Ice Blue**.

**Supplemental Movie 2**: MDfit-GROMACS Fitting of SimRNA-derived Coarse-Grained 7SK State B snRNA into Low-Resolution, Three-Dimensional SAXS Envelope. Fitted model is the result of 200,000 iterations of fitting for a molecular weight of 7049 atoms. Major Stem-Loops of the State A 7SK snRNA molecule is presented here, SL1 (**Cyan**), SL2 (**Magenta**), SL3 (**Red**), SL4 (**Green**), and SL0 (**Ochre**) with the remainder of the molecule being coloured **Ice Blue**.

**Supplemental Movie 3**: MDfit-GROMACS Fitting of SimRNA-derived Coarse-Grained 7SL RNA into Low-Resolution, Three-Dimensional SAXS Envelope. Fitted model is the result of 200,000 iterations of fitting for a molecular weight of 6048 atoms. Major domains are represented including the 5′-Domain (**Orange**), a Central Rod (**Dark Grey**), and a Central Domain (**Maroon**) with the remaining pivot residues not encapsulated by these definitions coloured **Ice Blue**.


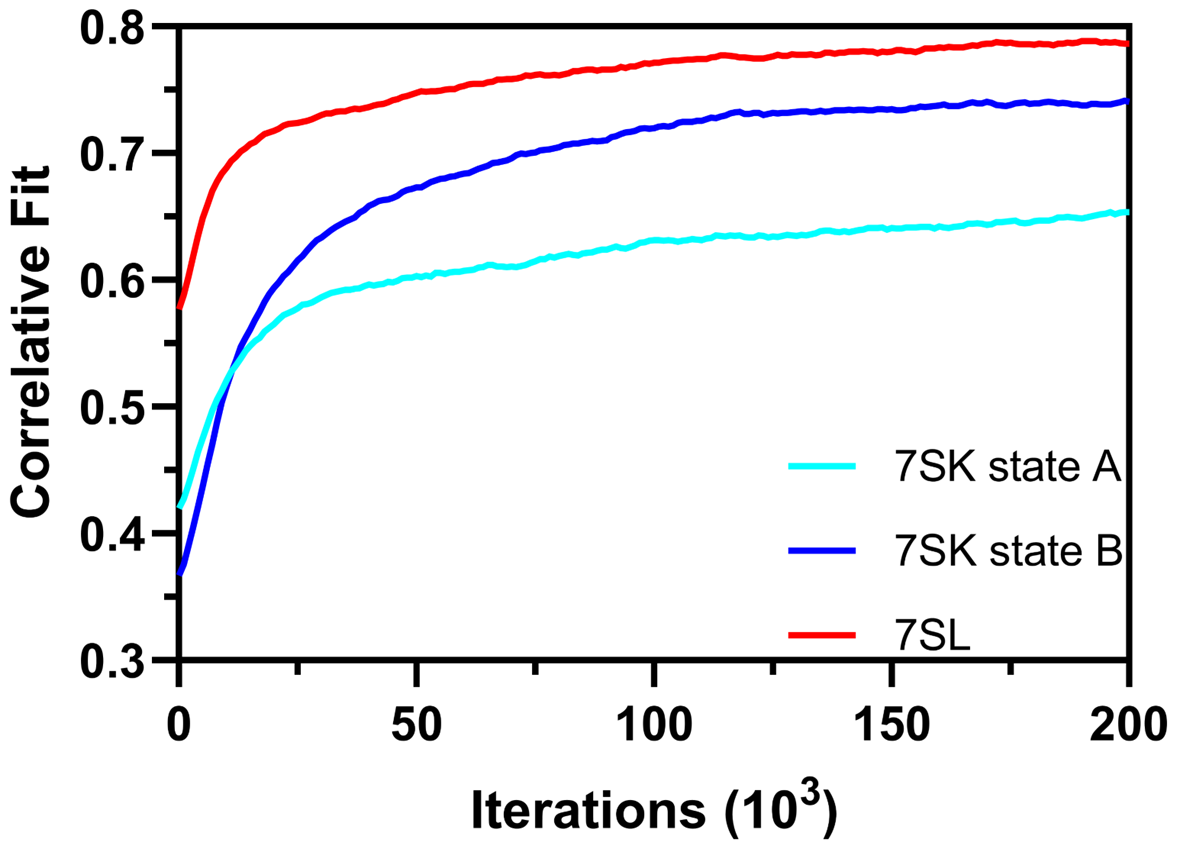


**Supplementary Figure 8**: MDfit-GROMACS Molecular Dynamic Simulation Correlative Fit Values of 7SK State A (**Light Blue**) and State B (**Blue**) snRNAs and 7SL RNA (**Red**). Represents the fitting of the 7SK State A and B and 7SL RNAs coarse-grained models with their respective SAXS envelopes under MDfit low-energy minimisation constraints. Fitting underwent 200,000 iterations with molecular weight of the 7SK snRNAs measured at 7049 atoms and 7SL RNA measured at 6048 atoms. Maximum Correlative Fit values are 0.6536 for 7SK State A, 0.7406 for 7SK State B, and 0.7866 for 7SL.

**Supplementary Table 4**: Sequence and Atomic Coordinate Alignment of Known High-Resolution 7SK and 7SL RNA Structures with Experimental All Atom (AA), Structure-Based Models of 7SK State A and B snRNA and 7SL RNA. structures are compared between refined all-atom models and merged all-atom models (Merged). Structures are presented with their sequence limits in nucleotide number and RCSD PBD identifier. **/** Refers to unaligned structures. **X** Refers to structures that are not applicable to reference model or those that were unassessed.

| **Structure** |  |  | **RMSD (Å)** | | | |  |
| --- | --- | --- | --- | --- | --- | --- | --- |
| **7SK State A** | | | **7SK State B** | | **7SL** | |
|  | **AA** | **Merged** | | **AA** | **Merged** | **AA** | **Merged** |
| **5LYU Native SL1 Stem**  **27 – 48, 60 – 84** | 21.713 | 17.593 | | **/** | **/** | **X** | **X** |
| **5IEM Native SL1 Stem**  **4 – 25, 30 – 54** | 23.221 | **/** | | **/** | **/** | **X** | **X** |
| **7SLQ Circular SL4 and SL0 Bound to MePCE and LARP7**  **289 – 332** | 26.738 | **/** | | 16.639 | 10.060 | **X** | **X** |
| **2KX8 Native SL4**  **296 – 331** | 24.225 | 10.863 | | 14.485 | **/** | **X** | **X** |
| **1MFQ Central Domain**  **114 – 237** | **X** | **X** | | **X** | **X** | 34.966 | **/** |
| **1L9A Central Domain**  **114 – 172, 175 – 237** | **X** | **X** | | **X** | **X** | 27.369 | **/** |
| **5M73 Central Domain**  **106 – 248** | **X** | **X** | | **X** | **X** | 35.047 | **/** |


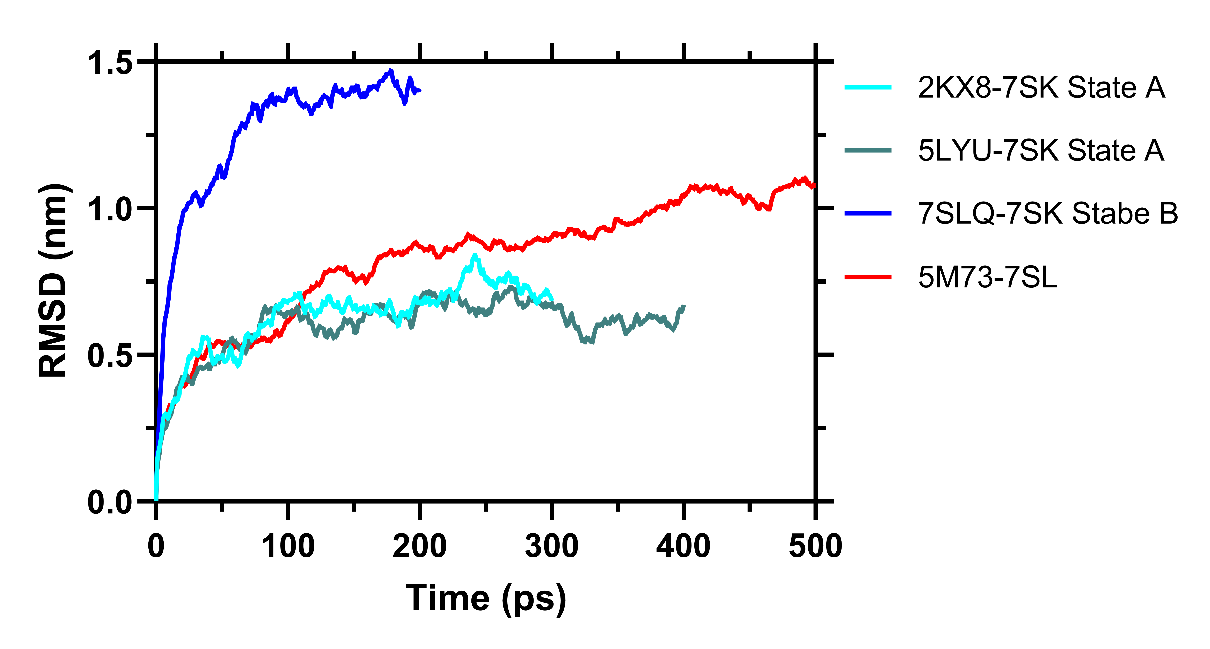


**Supplementary Figure 9**: Atom-to-Atom Distance Deviations Measurements Between Merged, All-Atom Known High-Resolution Crystallographic and NMR RNA Structures to All-Atom, Structure Based Models of 7SK State A and B snRNAs and 7SL RNA. Root Mean Square Deviations against time (ps) of merged all-atom, structure based models of 5LYU-7SK State A (**Faded Jade**), 2KX8-7SK State A (**Light Blue**), and 7SLQ-7SK State B (**Blue**) snRNAs, and 5M73-7SL (**Red**) compared to their respective coarse-grained derived, all-atom structures.
